# Supplementary material for: Generation of iPSC-derived limb progenitor-like cells for stimulating phalange regeneration in the adult mouse
Source: PubMed Central journal article supplement (PMC5735367; doi:10.1038/celldisc.2017.46), 2017-12-19
Supplement: celldisc201746-s1.pdf [file celldisc201746-s1.pdf]

## Supplementary Information

### Generation of iPSC-derived limb progenitor-like cells for stimulating phalange regeneration in the adult mouse

Ying Chen<sup>a,1,2</sup>, Hanqian Xu<sup>b,1</sup>, and Gufa Lin<sup>a,b,2</sup>

<sup>a</sup>Stem Cell Institute, Department of Genetics Cell Biology and Development, University of Minnesota, Minneapolis, MN 55455, USA; and

<sup>b</sup>Research Centre for Translational Medicine, Shanghai East Hospital, School of Life Sciences and Technology, Tongji University, Shanghai 200120, China.

## INVENTORY OF SUPPLEMENTARY INFORMATION

### Supplementary Figures

Supplementary Figure 1. Identification of factors for transplanting embryonic limb progenitor cells.

Supplementary Figure 2. Generation of *Prx1Cre:mT/mG* iPS cells.

Supplementary Figure 3. Hypertrophic chondrocytes in P2 stump.

Supplementary Figure 4. GFP cells contribute to connective tissues in adult D3P2 regenerate.

### Supplementary Tables.

Supplementary Table 1. Length of Phalange 1 (P1) and Phalange 2 (P2) and ratio of P2/P1 in Digits 2-4.

Supplementary Table 2. Expression values of genes known to function during limb development, or family members of signal transduction pathways known to contribute to limb patterning.

Supplementary Table 3. Expression values of 279 genes identified by Taher et al.

Supplementary Table 4. PCR primers used in this work.

# Supplementary Figures

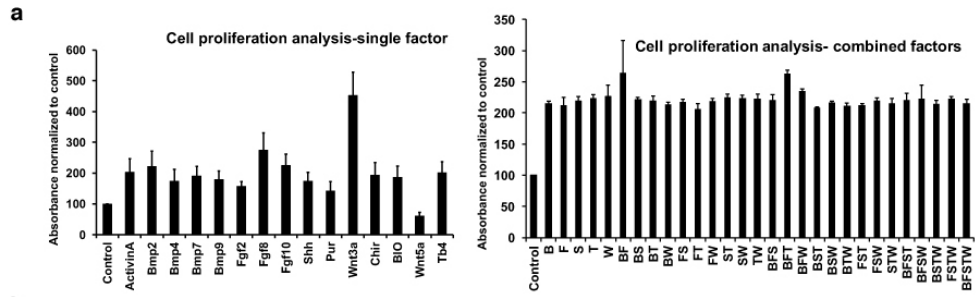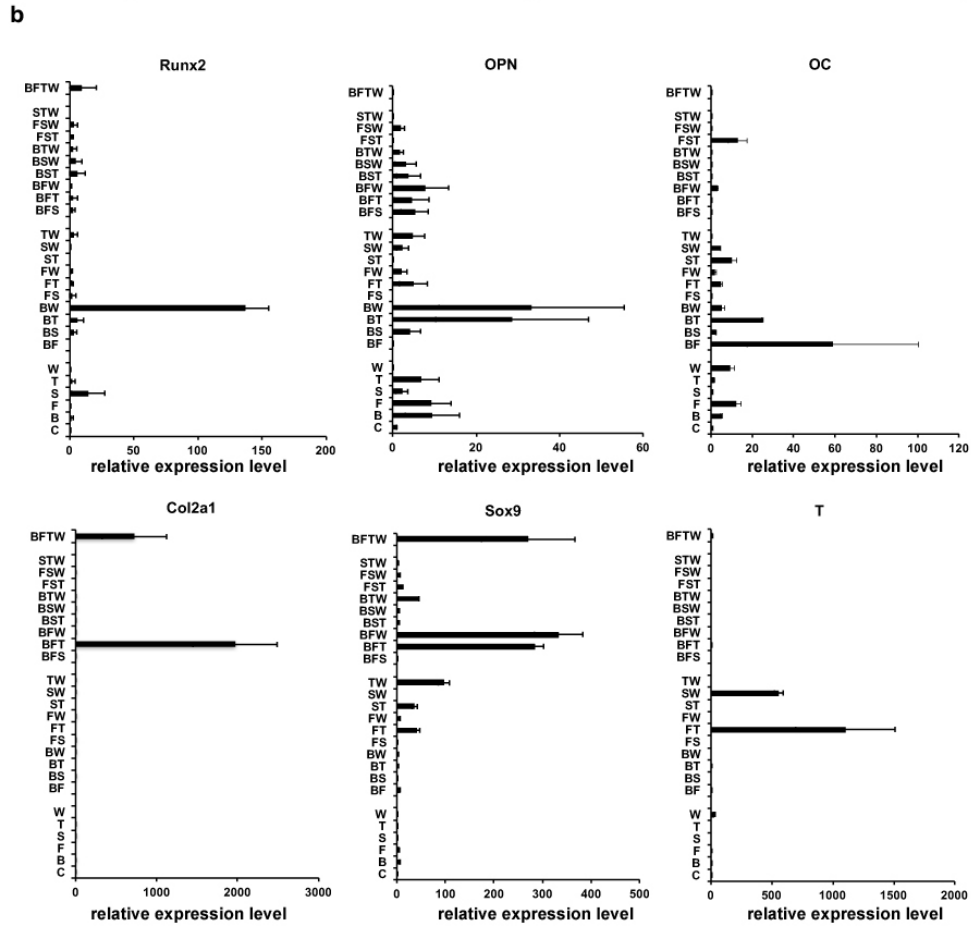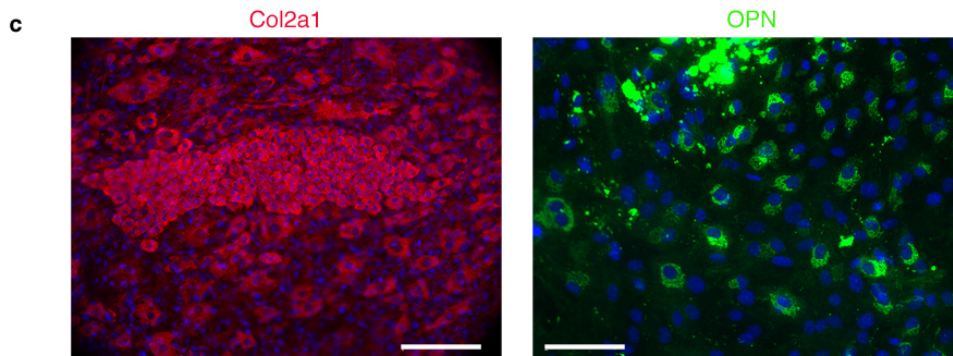

**Supplementary Figure 1** Identification of factors for transplanting embryonic limb progenitor cells. **(a)** Analysis of proliferation of E10.5 embryonic limb cells treated with single growth factors or small molecule, or combination of growth factors. Cell proliferation was analyzed with WST-1 reagent and normalized to control. Abbreviations: B = Bmp2, F = Fgf8, W = Wnt3a, T = Thymosin beta 4, S = Shh. **(b)** Detection of osteogenic markers *Runx2*, *OPN*, *Osteocalcin (OC)* and chondrogenic lineage markers *Collagen 2a1 (Col2a1)*, *Sox9*, and mesodermal marker *T* in E11 cells treated with growth factors. **(c)** Immunofluorescence detection of Col2a1 and OPN in cells treated with growth factors. Shown are the example of cells treated with BFTW (Bmp2, Fgf8, thymosin beta4 and Wnt3a). Scale bars: 100  $\mu$ m.

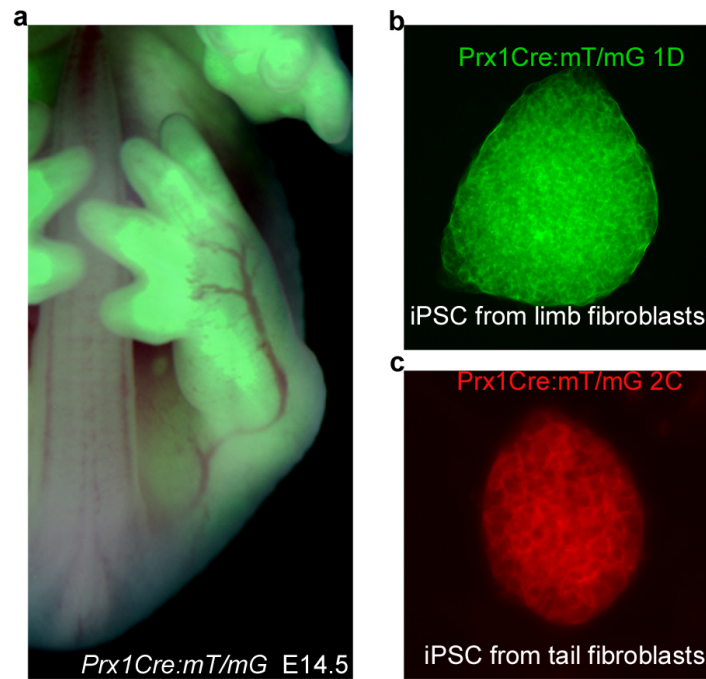

**Supplementary Figure 2** Generation of *Prx1Cre:mT/mG* iPS cells. **(a-c)** *Prx1Cre:mT/mG* transgenic mouse, crossed from *Prx1-Cre* and *CMV-mT/mG* mice, at E14.5 **(a)**, was used to generate iPS cells from the limb mesenchymal cells **(b)**, expressing membrane GFP) and tail fibroblasts **(c)**, expressing membrane tdTomato).

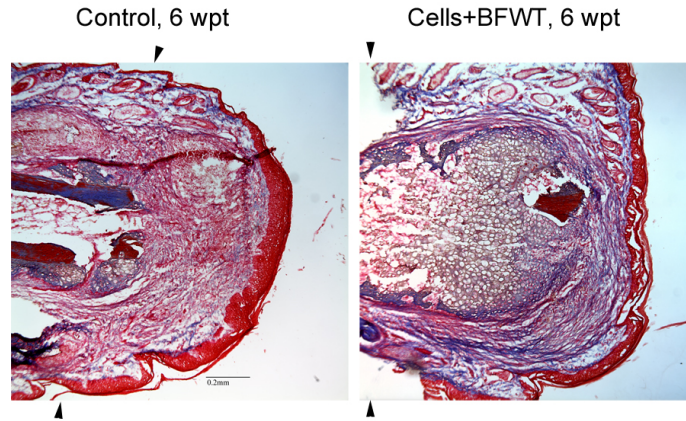

**Supplementary Figure 3** Hypertrophic chondrocytes in P2 stump after transplantation of embryonic limb progenitor cells together with BFTW, but not in controls. Black arrowheads indicate amputation levels in control. Scale bar 0.2 mm.

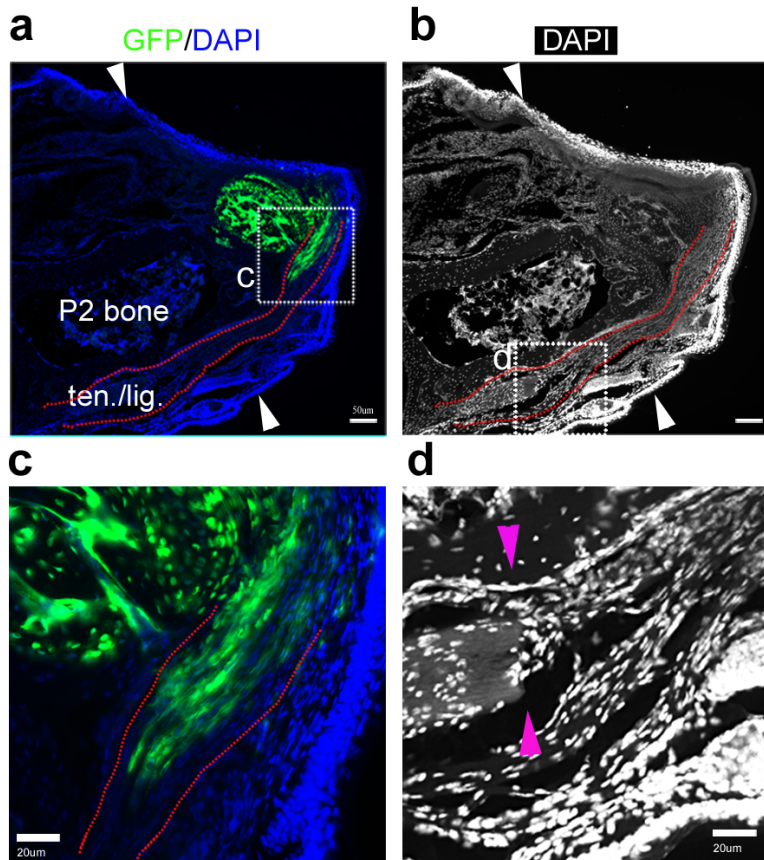

**Supplementary Figure 4** GFP cells contribute to connective tissues in adult D3P2 regenerate. (a,b) A parasagittal section of a D3P2 regenerate, with GFP+ cells shown in green, nuclei shown in blue (a) and in white (b). The red dotted line outlines a population of cells in continuity with the severed ligament and tendon. (c) Enlarged view of the GFP+ cells located in the distal connective tissue. (d) Enlarged view of the area where the ligament and tendon were amputated. Scale bar: 50  $\mu\text{m}$  in (a,b), 20  $\mu\text{m}$  in (c,d).

## Supplementary Tables.

### Supplementary Table 1.

Length of Phalange 1 (P1) and Phalange 2 (P2) and ratio of P2/P1 in Digits 2-4

| Age<br>(Weeks) | Average length of phalange ( $\mu\text{m}$ ) |      |      |      |      |      | Average P2/P1 (%) |       |       |
|----------------|----------------------------------------------|------|------|------|------|------|-------------------|-------|-------|
|                | D2P1                                         | D3P1 | D4P1 | D2P2 | D3P2 | D4P2 | D2                | D3    | D4    |
| 20             | 2893                                         | 2940 | 2900 | 1604 | 1646 | 1624 | 55.46             | 55.99 | 56.00 |
| 22             | 2942                                         | 2944 | 2935 | 1603 | 1649 | 1629 | 54.49             | 56.00 | 55.50 |
| 24             | 2897                                         | 2863 | 2911 | 1618 | 1547 | 1663 | 55.85             | 53.99 | 57.13 |
| 26             | 2850                                         | 2896 | 2853 | 1585 | 1636 | 1573 | 55.63             | 56.49 | 55.13 |
| 28             | 2905                                         | 2925 | 2912 | 1610 | 1594 | 1598 | 55.40             | 54.49 | 54.87 |
| 34             | 2890                                         | 2954 | 2898 | 1611 | 1698 | 1607 | 55.74             | 57.49 | 55.45 |
| 36             | 2874                                         | 2928 | 2880 | 1561 | 1625 | 1587 | 54.30             | 55.50 | 55.10 |
| 40             | 2961                                         | 3010 | 2949 | 1639 | 1701 | 1640 | 55.34             | 56.49 | 55.59 |
| 49             | 3035                                         | 3110 | 3045 | 1640 | 1726 | 1680 | 54.04             | 55.49 | 55.18 |

Note: Measurements taken from 6 untreated adult mice.

**Supplementary Table 2.** Expression values of genes known to function during limb development, or family members of signal transduction pathways known to contribute to limb patterning (Taher L, Collette NM, Muruges D, Maxwell E, Ovcharenko I, Loots GG. Global Gene Expression Analysis of Murine Limb Development. Emanuelli C, editor. PLoS ONE. 2011 Dec 9;6(12):e28358–60). Genes with FPKM <5 in all of the samples were not considered. Genes that are differentially expressed between control and induced fibrin bodies are highlighted in green (fold change  $\geq 2$  or  $\leq 0.25$ ). Compared to un-induced control fibrin bodies, upregulated genes in induced fibrin bodies are shown in green. Of these, genes that have the similar expression to the limb are highlighted in bode green (fold change between 0.25 to 2).

| Gene                       | Forelimb       | Hindlimb        | FB.1           | FB.2           | CTL             | 2C-<br>iPSC.1    | 2C-<br>iPSC.2    |
|----------------------------|----------------|-----------------|----------------|----------------|-----------------|------------------|------------------|
| <i>BMP signalling</i>      |                |                 |                |                |                 |                  |                  |
| Bmp1                       | 41.1163        | 30.4401         | 15.778         | 15.6434        | 20.5796         | 9.06214          | 6.42435          |
| Bmp2                       | 2.1158         | 1.0559          | 9.5837         | 6.92013        | 2.96549         | 0.306039         | 0.226085         |
| <b>Bmp4</b>                | <b>42.2176</b> | <b>36.7386</b>  | <b>65.0721</b> | <b>52.2874</b> | <b>8.1654</b>   | <b>3.90273</b>   | <b>4.06574</b>   |
| Bmp5                       | 1.81542        | 1.46024         | 8.69698        | 8.95021        | 0               | 0.0275568        | 0                |
| Bmp6                       | 0.613827       | 0.542468        | 7.74299        | 7.51293        | 2.66561         | 1.86078          | 1.78721          |
| <b>Bmp7</b>                | <b>22.8271</b> | <b>21.7391</b>  | <b>13.5691</b> | <b>14.0194</b> | <b>4.6323</b>   | <b>5.93613</b>   | <b>6.02421</b>   |
| Bmpr1a                     | 48.2772        | 43.5512         | 40.3985        | 38.3971        | 31.2364         | 22.8855          | 21.8785          |
| Bmpr1b                     | 3.51768        | 2.2461          | 0.30357        | 0.416357       | 0.0127711       | 0.0299887        | 0.0565046        |
| <b>Bambi</b>               | <b>9.28003</b> | <b>10.0213</b>  | <b>9.56697</b> | <b>6.67895</b> | <b>1.73753</b>  | <b>5.39703</b>   | <b>4.90676</b>   |
| Grem1                      | 18.898         | 20.0018         | 11.8786        | 10.7486        | 5.75164         | 0.742682         | 0.619742         |
| Grem2                      | 0.14793        | 0.0119994       | 2.85316        | 4.34277        | 3.26785         | 1.73355          | 0.991053         |
| Bmper                      | 0.358448       | 0.0957309       | 1.7852         | 1.70001        | 2.52792         | 0.315349         | 0.300124         |
| Bmpr2                      | 12.1338        | 10.8143         | 14.4404        | 11.2239        | 10.0284         | 5.21065          | 5.54421          |
| Gdf2                       | 0              | 0               | 0.0713398      | 0.0343359      | 0               | 0                | 0                |
| Gdf3                       | 0              | 0.050991        | 5.53476        | 9.70384        | 19.0493         | 22.9353          | 21.301           |
| Gdf5                       | 0.913211       | 0.236897        | 0.116368       | 0.0897735      | 0.151789        | 0.260373         | 0.284933         |
| <b>Gdf10</b>               | <b>0.84128</b> | <b>0.268137</b> | <b>51.3159</b> | <b>47.3619</b> | <b>0.176177</b> | <b>0.0390354</b> | <b>0.0397767</b> |
| Nog                        | 0.438899       | 0.488936        | 6.6218         | 5.09084        | 8.74624         | 0.628629         | 0.501818         |
| <i>TGF-beta signalling</i> |                |                 |                |                |                 |                  |                  |
| Tgfb1                      | 6.89925        | 7.44798         | 7.43439        | 7.82643        | 4.31869         | 4.33263          | 3.44472          |
| Tgfb1i1                    | 5.6971         | 4.43484         | 16.1018        | 19.7766        | 9.98826         | 1.96006          | 1.91155          |
| <b>Tgfb2</b>               | <b>8.8936</b>  | <b>2.45205</b>  | <b>10.0738</b> | <b>12.0774</b> | <b>0.805915</b> | <b>0.366839</b>  | <b>0.465031</b>  |
| Tgfb3                      | 7.01735        | 5.3703          | 2.30691        | 2.99435        | 0.893279        | 1.57054          | 1.2826           |
| Tgfb1                      | 15.2798        | 9.77302         | 47.1929        | 59.9915        | 3.58767         | 1.69261          | 1.19499          |
| Tgfbr1                     | 60.957         | 64.2437         | 16.4238        | 15.8806        | 12.0594         | 11.8847          | 9.58057          |
| Tgfbr2                     | 6.61189        | 6.8938          | 9.78798        | 9.33589        | 12.1532         | 2.43059          | 1.46519          |
| Tgfbr3                     | 4.80494        | 4.24422         | 19.6985        | 14.4288        | 18.6098         | 3.74457          | 2.62582          |
| <i>Hedgehog signalling</i> |                |                 |                |                |                 |                  |                  |
| <b>Gli1</b>                | <b>18.9221</b> | <b>16.6412</b>  | <b>28.3918</b> | <b>25.6462</b> | <b>1.97277</b>  | <b>6.16965</b>   | <b>4.18739</b>   |
| <b>Gli2</b>                | <b>17.1178</b> | <b>18.7088</b>  | <b>13.2044</b> | <b>11.2478</b> | <b>3.55538</b>  | <b>8.35933</b>   | <b>6.22358</b>   |
| Gli3                       | 45.8305        | 53.3122         | 8.58039        | 6.94927        | 1.14943         | 2.83141          | 1.43103          |
| Shh                        | 9.40159        | 7.20801         | 1.14964        | 0.921135       | 0.0195031       | 0.12             | 0.0202665        |
| Ihh                        | 0.0466544      | 0.167422        | 30.8763        | 25.0125        | 6.38075         | 0.150855         | 0.384396         |

|              |                |                |                |                |                |                |                |
|--------------|----------------|----------------|----------------|----------------|----------------|----------------|----------------|
| <b>Ptch2</b> | <b>6.81732</b> | <b>4.90773</b> | <b>4.39102</b> | <b>5.37708</b> | <b>2.19952</b> | <b>5.83271</b> | <b>6.34022</b> |
| Ptch1        | 21.6036        | 20.4879        | 51.809         | 44.6577        | 14.3588        | 35.1278        | 30.6699        |

*Fgf signalling*

|              |                |                 |                |                 |                 |                |                 |
|--------------|----------------|-----------------|----------------|-----------------|-----------------|----------------|-----------------|
| Fgf2         | 1.48826        | 0.757688        | 0.891656       | 0.702374        | 0.326392        | 0.656024       | 0.152977        |
| Fgf3         | 0.266177       | 0.214751        | 1.12616        | 0.951847        | 4.38775         | 0.999027       | 2.57397         |
| Fgf4         | 1.86172        | 1.57053         | 8.40645        | 12.9527         | 51.933          | 106.927        | 114.041         |
| Fgf5         | 0.382965       | 0.350881        | 0.310712       | 0.108404        | 0.543958        | 0.476246       | 0.510554        |
| Fgf6         | 0              | 0               | 0.0463519      | 0.044384        | 0               | 0.0109628      | 0               |
| Fgf7         | 0.0775283      | 0.016899        | 0.256194       | 0.131633        | 0.798674        | 1.00663        | 0.644433        |
| <b>Fgf8</b>  | <b>69.6968</b> | <b>75.7258</b>  | <b>1.56978</b> | <b>0.303374</b> | <b>0.405132</b> | <b>1.91589</b> | <b>0.602125</b> |
| Fgf9         | 1.78063        | 0.596221        | 0.161094       | 0.224081        | 0.116906        | 0              | 0.0336944       |
| Fgf10        | 12.902         | 12.2524         | 3.31859        | 3.03151         | 3.55465         | 0.846225       | 0.579062        |
| <b>Fgf11</b> | <b>0.4543</b>  | <b>0.144819</b> | <b>12.4321</b> | <b>9.83742</b>  | <b>2.01678</b>  | <b>6.28716</b> | <b>4.8598</b>   |
| Fgf12        | 0.0960669      | 0               | 0.12404        | 0.267456        | 0.0347701       | 0              | 0               |
| Fgf13        | 3.70648        | 2.49971         | 1.52548        | 1.05713         | 0.211856        | 1.47795        | 0.917202        |
| Fgf15        | 0.187638       | 0.221193        | 1.96449        | 4.66697         | 2.85801         | 3.16458        | 2.78811         |
| Fgf17        | 0.418086       | 0.745639        | 0.63193        | 0.617159        | 0.925568        | 4.26915        | 3.02963         |
| Fgf18        | 0.971816       | 0.419921        | 0.142451       | 0.0687277       | 0.125288        | 0.639095       | 0.514802        |
| Fgfbp1       | 0.380412       | 0.0378878       | 6.77898        | 11.9033         | 11.8247         | 8.11797        | 6.9789          |
| Fgfbp3       | 2.22071        | 2.08695         | 4.87074        | 3.9873          | 1.26585         | 1.68267        | 2.80824         |
| <b>Fgfr1</b> | <b>92.6589</b> | <b>80.3167</b>  | <b>127.984</b> | <b>106.587</b>  | <b>31.8183</b>  | <b>49.5417</b> | <b>42.3615</b>  |
| Fgfr1op      | 22.9171        | 23.415          | 17.6359        | 19.2189         | 18.4851         | 31.1748        | 33.9446         |
| Fgfr1op2     | 34.9704        | 34.5044         | 34.6165        | 35.3808         | 30.3356         | 35.687         | 35.666          |
| <b>Fgfr2</b> | <b>19.7252</b> | <b>15.0701</b>  | <b>44.6145</b> | <b>34.1822</b>  | <b>8.41835</b>  | <b>4.13334</b> | <b>3.86136</b>  |
| Fgfr3        | 2.85275        | 1.36994         | 6.81378        | 5.65942         | 10.2451         | 1.21247        | 1.80415         |
| Fgfr4        | 0.634208       | 0.122929        | 6.3285         | 4.85212         | 4.25137         | 3.5335         | 4.00052         |

*ROR signalling*

|             |                |                |                |                |                 |                  |                  |
|-------------|----------------|----------------|----------------|----------------|-----------------|------------------|------------------|
| <b>Ror1</b> | <b>6.40526</b> | <b>6.47268</b> | <b>4.17708</b> | <b>3.40544</b> | <b>0.557197</b> | <b>0.0882142</b> | <b>0.0682878</b> |
| <b>Ror2</b> | <b>37.2502</b> | <b>38.9415</b> | <b>24.5556</b> | <b>25.0132</b> | <b>2.05418</b>  | <b>3.84918</b>   | <b>3.35404</b>   |

*Wnt signalling*

|              |                |                |                |                |                 |                 |                  |
|--------------|----------------|----------------|----------------|----------------|-----------------|-----------------|------------------|
| Wnt1         | 0              | 0              | 0.0504951      | 0.0489436      | 0.251133        | 0.0229993       | 0                |
| Wnt2         | 0.35319        | 3.97549        | 0.561628       | 0.327051       | 0.0229917       | 0.115813        | 0.0229217        |
| Wnt2b        | 0.486403       | 0.774248       | 0.383241       | 0.304795       | 0.620087        | 0.29605         | 0.253378         |
| Wnt3         | 3.27994        | 2.80716        | 0.297951       | 0.354052       | 0.149052        | 0.310951        | 0.34574          |
| Wnt3a        | 0.0621071      | 0              | 0.0422144      | 0              | 0.0587868       | 0.0991995       | 0.244115         |
| Wnt4         | 2.74924        | 2.66876        | 5.69687        | 4.18242        | 1.29194         | 0.564534        | 0.639001         |
| <b>Wnt5a</b> | <b>55.9313</b> | <b>40.1678</b> | <b>14.6161</b> | <b>13.3926</b> | <b>1.67552</b>  | <b>0.795035</b> | <b>0.55928</b>   |
| <b>Wnt5b</b> | <b>11.9207</b> | <b>11.2737</b> | <b>2.24403</b> | <b>2.35839</b> | <b>0.32861</b>  | <b>0.392469</b> | <b>0.0643258</b> |
| <b>Wnt6</b>  | <b>26.0981</b> | <b>20.5897</b> | <b>3.02657</b> | <b>2.30985</b> | <b>0.681776</b> | <b>0.532431</b> | <b>0.594223</b>  |
| Wnt7a        | 4.90943        | 4.78793        | 0.313289       | 0.265261       | 0.840938        | 0.121928        | 0.209446         |
| Wnt7b        | 7.88962        | 5.8284         | 3.65434        | 3.94504        | 21.1166         | 1.58417         | 3.28589          |
| Wnt8a        | 0.12933        | 0.283159       | 0.430967       | 0.191449       | 0.215552        | 0.183123        | 0.0310506        |
| Wnt8b        | 0              | 0              | 0.587015       | 0.435564       | 0.0313908       | 0.0156974       | 0.0157253        |

|        |            |           |           |           |           |           |           |
|--------|------------|-----------|-----------|-----------|-----------|-----------|-----------|
| Wnt9a  | 0.39927    | 0.24166   | 3.45912   | 3.34018   | 3.42868   | 3.02718   | 3.39226   |
| Wnt9b  | 0.799174   | 0.639473  | 0.0121365 | 0.0117007 | 0.0228576 | 0.0114228 | 0         |
| Wnt10a | 0.691643   | 0.549146  | 1.05209   | 1.11813   | 0.108554  | 0.0896497 | 0         |
| Wnt10b | 2.06602    | 1.48473   | 0.159732  | 0.280619  | 0.147837  | 0.105406  | 0.207136  |
| Wnt11  | 15.971     | 6.17571   | 89.6272   | 66.4713   | 2.78214   | 0.837172  | 1.72387   |
| Wnt16  | 1.59311    | 0.795801  | 1.44182   | 0.462924  | 0.199636  | 0.0671976 | 0.226571  |
| Dkk1   | 5.44566    | 6.17909   | 32.9601   | 27.4774   | 1.50701   | 0.39568   | 0.980884  |
| Dkk2   | 2.04847    | 0.995971  | 3.59318   | 4.40577   | 0.172665  | 0.361789  | 0.361559  |
| Dkk3   | 2.14285    | 1.80275   | 6.99443   | 6.81038   | 6.46641   | 5.96187   | 4.09073   |
| Dkk4   | 0.131098   | 0.337261  | 0.0915074 | 0.0436223 | 0         | 0         | 0.0422822 |
| Lrp1   | 23.4116    | 20.3677   | 25.0608   | 19.0557   | 11.0844   | 44.7146   | 30.3021   |
| Lrp1b  | 0.00564225 | 0         | 0.0413623 | 0.0892576 | 0.0197965 | 0.0545354 | 0.0527807 |
| Lrp2   | 0.0417318  | 0.0767206 | 22.5416   | 23.2702   | 16.1831   | 8.00916   | 7.64074   |
| Lrp2bp | 0.0719501  | 0.0297475 | 0.207448  | 0.034063  | 0.394765  | 0.315873  | 0.131339  |
| Lrp3   | 19.3174    | 20.3424   | 5.21036   | 5.77948   | 1.44214   | 3.89153   | 2.65957   |
| Lrp4   | 8.38668    | 8.15991   | 6.76346   | 5.8327    | 2.03529   | 2.86026   | 2.00222   |
| Lrp5   | 29.5633    | 24.278    | 29.101    | 23.3522   | 21.4094   | 28.0696   | 24.0555   |
| Lrp6   | 27.6413    | 24.4911   | 19.9843   | 15.5319   | 18.9993   | 23.3186   | 21.9505   |
| Lrp8   | 6.56273    | 7.69648   | 7.70058   | 8.56668   | 12.1983   | 8.98344   | 7.2487    |
| Lrp10  | 9.83712    | 10.8201   | 26.4388   | 23.3825   | 33.8663   | 15.0525   | 15.2042   |
| Lrp11  | 0.936304   | 1.59321   | 7.92238   | 7.8315    | 12.0708   | 33.385    | 35.465    |
| Lrp12  | 14.0525    | 13.2626   | 7.03608   | 6.38717   | 3.61275   | 4.33714   | 3.93223   |
| Tcf3   | 239.73     | 216.125   | 77.5758   | 71.8792   | 52.7012   | 81.7705   | 75.6986   |
| Tcf4   | 60.6172    | 54.6945   | 74.4093   | 60.1254   | 6.90369   | 8.85666   | 6.3081    |
| Tcf7   | 28.5281    | 46.3565   | 40.2796   | 35.5226   | 25.8248   | 38.6179   | 46.2082   |
| Tcf7l1 | 42.3222    | 37.9325   | 11.7404   | 12.6008   | 40.7595   | 41.1606   | 39.555    |
| Tcf7l2 | 18.2637    | 15.0159   | 7.85925   | 7.00558   | 18.6704   | 3.32431   | 3.84908   |
| Tcf15  | 0.853161   | 1.31312   | 1.63724   | 2.5119    | 11.7819   | 22.2162   | 19.473    |
| Tcf12  | 142.735    | 148.01    | 95.9788   | 85.1101   | 16.671    | 19.9014   | 14.8191   |
| Tcf15  | 24.2625    | 22.0611   | 3.20663   | 3.09052   | 2.99857   | 11.6885   | 9.4521    |
| Tcf19  | 20.0977    | 20.7946   | 11.8378   | 13.5034   | 4.46987   | 8.26853   | 8.59742   |
| Tcf20  | 19.1393    | 19.8577   | 15.5848   | 13.3338   | 21.2335   | 22.8485   | 21.136    |
| Tcf21  | 0          | 0.641899  | 0.215192  | 0         | 0.0975097 | 0         | 0         |
| Tcf23  | 0          | 0         | 1.88295   | 1.26562   | 3.82034   | 0.215251  | 0.199145  |
| Tcf24  | 0.0408896  | 0.056194  | 0.658345  | 0.848819  | 1.15816   | 1.59565   | 1.55223   |
| Tcf25  | 50.929     | 53.3062   | 108.003   | 109.552   | 76.738    | 79.1937   | 77.6308   |
| Fzd1   | 35.9394    | 34.2638   | 11.7598   | 11.2089   | 1.89381   | 2.21363   | 1.07927   |
| Fzd10  | 41.3391    | 43.0741   | 52.327    | 30.5844   | 3.86483   | 2.61316   | 2.80629   |
| Fzd2   | 109.028    | 84.4435   | 25.6997   | 27.9194   | 4.50789   | 9.72899   | 7.14731   |
| Fzd3   | 11.4526    | 12.203    | 4.77998   | 2.81201   | 1.18395   | 2.83446   | 2.06036   |
| Fzd4   | 5.15098    | 5.11724   | 1.77453   | 2.42165   | 1.14351   | 1.90044   | 1.45486   |
| Fzd5   | 0.803757   | 0.702388  | 7.71534   | 5.92601   | 8.74904   | 24.5471   | 22.0431   |
| Fzd6   | 4.30522    | 4.65576   | 7.29971   | 4.92151   | 3.02026   | 2.08723   | 1.7898    |
| Fzd7   | 36.8867    | 38.8466   | 27.3071   | 26.1454   | 25.069    | 49.7789   | 43.2107   |
| Fzd8   | 5.02403    | 5.33793   | 2.65666   | 3.26848   | 1.86372   | 2.31245   | 1.28024   |
| Fzd9   | 0.355179   | 0.146399  | 1.04408   | 1.66699   | 1.63671   | 3.1449    | 2.52988   |



|             |                |                |               |                |                |                |                |
|-------------|----------------|----------------|---------------|----------------|----------------|----------------|----------------|
| <b>Lef1</b> | <b>30.8284</b> | <b>35.8057</b> | <b>37.831</b> | <b>31.3818</b> | <b>2.28727</b> | <b>9.06981</b> | <b>8.20697</b> |
| Sost        | 7.94316        | 7.13728        | 0             | 0.0295147      | 0.111445       | 0.0854866      | 0.117364       |

*Transcription factors*

|              |                |                |                |                 |                  |                  |                  |
|--------------|----------------|----------------|----------------|-----------------|------------------|------------------|------------------|
| Sox1         | 0.0115368      | 0              | 0.202212       | 0.686705        | 1.05126          | 1.88902          | 1.23684          |
| Sox2         | 0.498167       | 0.193591       | 48.4501        | 55.6054         | 113.736          | 175.229          | 191.387          |
| Sox3         | 0              | 0.164792       | 1.13026        | 0.745942        | 1.32237          | 6.64476          | 4.39978          |
| Sox4         | 113.973        | 82.1393        | 31.1478        | 37.0805         | 19.5432          | 14.5644          | 11.7036          |
| <b>Sox5</b>  | <b>6.50545</b> | <b>4.24235</b> | <b>0.37551</b> | <b>0.412874</b> | <b>0.195992</b>  | <b>0.0128753</b> | <b>0.0311228</b> |
| Sox6         | 2.21362        | 2.43662        | 0.40372        | 1.35327         | 0.519264         | 0.0492503        | 0.116905         |
| Sox7         | 4.30397        | 5.44544        | 4.10008        | 4.29446         | 6.67185          | 0.541524         | 0.721024         |
| Sox8         | 5.0172         | 8.41812        | 0.171377       | 0.714158        | 0.265453         | 1.43261          | 1.30099          |
| Sox9         | 36.9377        | 20.3915        | 1.72768        | 1.60982         | 1.11611          | 1.10077          | 0.827771         |
| Sox10        | 0.766757       | 0.1923         | 0.0609567      | 0.0395443       | 0.130167         | 0.20905          | 0.370505         |
| <b>Sox11</b> | <b>112.645</b> | <b>106.069</b> | <b>69.0621</b> | <b>53.9496</b>  | <b>3.40477</b>   | <b>8.04077</b>   | <b>6.91498</b>   |
| Sox12        | 68.4595        | 55.4396        | 17.8175        | 18.2027         | 12.3461          | 24.0953          | 21.3891          |
| Sox13        | 16.3977        | 23.5677        | 7.78686        | 6.2643          | 5.90714          | 7.69813          | 7.33587          |
| Sox14        | 0.690213       | 0.485243       | 0.0845927      | 0.0546279       | 0                | 0                | 0.0917474        |
| Sox15        | 0.24499        | 0.142139       | 9.44542        | 13.1732         | 27.6233          | 28.4674          | 38.9536          |
| Sox17        | 6.08338        | 6.4162         | 99.6058        | 86.8578         | 71.5345          | 0.994284         | 2.00075          |
| <b>Sox18</b> | <b>17.7428</b> | <b>24.3378</b> | <b>9.30115</b> | <b>7.04412</b>  | <b>0.0336831</b> | <b>0.410631</b>  | <b>0.409482</b>  |
| Sox21        | 0.240907       | 0.0750004      | 3.81316        | 3.4661          | 4.5028           | 3.70913          | 6.94644          |
| Sp1          | 25.5609        | 28.6819        | 32.1227        | 32.8347         | 36.8723          | 59.2289          | 64.5988          |
| Sp100        | 0.0457486      | 0.105291       | 0.0725747      | 0               | 0.476953         | 0.30509          | 0.132497         |
| Sp2          | 13.5848        | 14.5376        | 8.39429        | 9.30781         | 13.5535          | 22.6216          | 21.414           |
| Sp3          | 46.0433        | 45.8397        | 44.0705        | 43.3881         | 49.6317          | 37.8384          | 45.0381          |
| Sp4          | 7.97996        | 6.37753        | 4.0627         | 4.1989          | 3.58967          | 4.36949          | 4.15837          |
| <b>Sp5</b>   | <b>3.97052</b> | <b>2.17369</b> | <b>19.4949</b> | <b>14.3797</b>  | <b>0.17976</b>   | <b>0.0799848</b> | <b>0.346333</b>  |
| Sp6          | 8.24819        | 10.1207        | 4.35559        | 2.55323         | 1.9775           | 3.64567          | 3.98274          |
| <b>Sp7</b>   | <b>1.33066</b> | <b>1.0265</b>  | <b>11.7925</b> | <b>8.7158</b>   | <b>0.0195407</b> | <b>0.0193088</b> | <b>0.0789013</b> |
| <b>Sp8</b>   | <b>6.30727</b> | <b>6.49008</b> | <b>2.55122</b> | <b>1.15645</b>  | <b>0.629256</b>  | <b>0.295569</b>  | <b>0.134238</b>  |
| Sp9          | 0.304577       | 0.592259       | 1.92583        | 0.979643        | 0.159434         | 0.034846         | 0.0815457        |
| Pax1         | 13.4157        | 0.869013       | 0.157513       | 0.143549        | 0.0822346        | 0                | 0                |
| Pax2         | 0.0904443      | 0.184125       | 0.155382       | 0.436931        | 0.0241924        | 0                | 0.0175603        |
| Pax3         | 5.89473        | 4.05589        | 0.751823       | 0.817375        | 0.293665         | 0.0125333        | 0.0122428        |
| Pax4         | 0              | 0              | 0              | 0               | 0                | 0                | 0                |
| Pax5         | 0              | 0.124073       | 0.214778       | 0.16699         | 0.0433977        | 0.180602         | 0.134768         |
| Pax6         | 0.0373868      | 0.114682       | 0.445798       | 0.640644        | 0.755433         | 1.67643          | 0.901632         |
| Pax7         | 0.171933       | 0.135619       | 0.0179191      | 0.0258989       | 0.050608         | 0.0828146        | 0.0421799        |
| Pax8         | 0.0420717      | 0.0361246      | 0.457781       | 0.461315        | 0.429728         | 0.285708         | 0.142661         |
| Pax9         | 0.440775       | 0.208223       | 0.711069       | 1.05991         | 0.532443         | 0.0265685        | 0.0775256        |
| Sall1        | 29.4874        | 23.0166        | 10.0291        | 10.0441         | 17.2738          | 27.3978          | 18.9684          |
| <b>Sall2</b> | <b>23.3888</b> | <b>23.7906</b> | <b>7.26305</b> | <b>6.45616</b>  | <b>2.01312</b>   | <b>3.49259</b>   | <b>2.28446</b>   |
| <b>Sall3</b> | <b>13.5222</b> | <b>9.46549</b> | <b>0.99487</b> | <b>0.631397</b> | <b>0.0786346</b> | <b>0.555944</b>  | <b>0.540468</b>  |
| Sall4        | 17.4844        | 27.1282        | 25.75          | 23.5963         | 50.1525          | 75.8042          | 78.1869          |
| <b>Msx1</b>  | <b>130.815</b> | <b>162.33</b>  | <b>30.272</b>  | <b>14.2444</b>  | <b>0.416495</b>  | <b>0.854331</b>  | <b>0.774057</b>  |

|              |                 |                |                |                |                 |                  |                  |
|--------------|-----------------|----------------|----------------|----------------|-----------------|------------------|------------------|
| <b>Msx2</b>  | <b>23.8193</b>  | <b>14.6941</b> | <b>29.9828</b> | <b>16.4369</b> | <b>10.0444</b>  | <b>0.545068</b>  | <b>0.465049</b>  |
| Msx3         | 0.0803319       | 0.0475325      | 0.82367        | 1.94111        | 0.355078        | 0                | 0.0789988        |
| Meis1        | 22.5852         | 33.7943        | 8.55588        | 9.95732        | 5.99392         | 0.963567         | 0.9801           |
| <b>Meis2</b> | <b>37.5164</b>  | <b>57.6914</b> | <b>16.254</b>  | <b>19.0293</b> | <b>2.97226</b>  | <b>1.11425</b>   | <b>1.55158</b>   |
| Meis3        | 4.50534         | 10.6087        | 8.71088        | 7.41972        | 5.44191         | 1.25528          | 1.3392           |
| Meox1        | 4.47254         | 6.36929        | 0.0467142      | 0.0678509      | 0.0443554       | 0                | 0.0649347        |
| <b>Meox2</b> | <b>23.0984</b>  | <b>8.37563</b> | <b>2.57519</b> | <b>4.58155</b> | <b>0</b>        | <b>0.0424645</b> | <b>0.0206658</b> |
| <b>Pitx1</b> | <b>0.245572</b> | <b>176.955</b> | <b>40.5515</b> | <b>25.9238</b> | <b>1.91733</b>  | <b>0.0989473</b> | <b>0.258147</b>  |
| Pitx2        | 11.0386         | 3.51832        | 15.5094        | 12.1844        | 18.108          | 15.5345          | 10.7844          |
| Pitx3        | 0.656707        | 0              | 0              | 0.048101       | 0               | 0.089463         | 0.94361          |
| Myf5         | 3.60262         | 0.358569       | 0.0903898      | 0.143461       | 0               | 0                | 0.0279389        |
| Myf6         | 0.0504796       | 0.0437275      | 0              | 0              | 0               | 0                | 0                |
| Dlx1         | 2.0803          | 2.03759        | 0.347723       | 0.211478       | 0.119191        | 0.107677         | 0.308071         |
| <b>Dlx2</b>  | <b>7.63434</b>  | <b>7.54549</b> | <b>4.31935</b> | <b>1.64669</b> | <b>0.191472</b> | <b>0.192636</b>  | <b>0.410593</b>  |
| <b>Dlx5</b>  | <b>4.8294</b>   | <b>5.30261</b> | <b>5.40332</b> | <b>5.49241</b> | <b>0</b>        | <b>0.042063</b>  | <b>0.0448527</b> |
| Lbx1         | 19.4047         | 14.3668        | 0.588205       | 0.647748       | 1.36827         | 0.20259          | 0.266896         |
| Lbx2         | 0.176251        | 0.317431       | 0.0881365      | 0.257786       | 0               | 0.160073         | 0.0850159        |
| Evx1         | 4.40766         | 1.87491        | 2.18454        | 0.309646       | 0.134535        | 0                | 0                |
| Lmx1a        | 0.558351        | 0.739587       | 0.161246       | 0.259575       | 0.224278        | 0.051276         | 0.0165677        |
| <b>Lmx1b</b> | <b>58.8766</b>  | <b>63.961</b>  | <b>5.09754</b> | <b>3.99891</b> | <b>1.04315</b>  | <b>1.11573</b>   | <b>1.23868</b>   |
| <b>Jag1</b>  | <b>6.44265</b>  | <b>3.85672</b> | <b>5.45555</b> | <b>4.89323</b> | <b>2.111</b>    | <b>3.54299</b>   | <b>2.57341</b>   |
| Jag2         | 10.7073         | 10.2832        | 8.7727         | 8.61176        | 11.4039         | 23.6076          | 28.8666          |
| En1          | 2.74341         | 2.4147         | 1.14929        | 1.61345        | 0.612985        | 1.00419          | 0.659871         |
| En2          | 0               | 0              | 1.53908        | 3.01124        | 0.668965        | 1.24968          | 0.970712         |
| Mog          | 0.0694745       | 0.0920985      | 0.0732134      | 0.105346       | 0.163806        | 1.06696          | 0.949599         |

*HOX transcription factors*

|              |                |                |                |                |                 |                 |                 |
|--------------|----------------|----------------|----------------|----------------|-----------------|-----------------|-----------------|
| Hoxa1        | 0.679508       | 0.897361       | 3.00463        | 4.45891        | 3.85168         | 4.34817         | 4.85121         |
| <b>Hoxa2</b> | <b>3.73543</b> | <b>2.92742</b> | <b>4.52491</b> | <b>5.3456</b>  | <b>0.255411</b> | <b>0.220216</b> | <b>0.225672</b> |
| <b>Hoxa3</b> | <b>10.3435</b> | <b>8.99015</b> | <b>5.86199</b> | <b>5.96029</b> | <b>1.06461</b>  | <b>1.30226</b>  | <b>0.488617</b> |
| Hoxa4        | 2.85292        | 2.09997        | 1.77263        | 2.01744        | 0.436238        | 0.569353        | 0.61906         |
| Hoxa5        | 21.6693        | 17.7632        | 6.07767        | 6.80512        | 0.767485        | 0.913254        | 1.04486         |
| Hoxa6        | 11.6316        | 8.75624        | 1.81836        | 0.619937       | 0               | 0               | 0               |
| Hoxa7        | 22.456         | 15.0538        | 8.8659         | 7.88693        | 0.543855        | 0.471061        | 0.152793        |
| Hoxa9        | 94.9514        | 77.0644        | 10.2438        | 6.6549         | 0.339014        | 0.503456        | 0.491208        |
| Hoxa10       | 140.411        | 137.497        | 10.9074        | 8.53987        | 0.511009        | 0.269297        | 0.420438        |
| Hoxa11       | 77.8928        | 79.6439        | 10.694         | 7.53685        | 0.207571        | 0.0229215       | 0.163433        |
| Hoxa13       | 13.7286        | 6.13086        | 1.62043        | 1.00489        | 0.887693        | 0.242069        | 0.273141        |
| Hoxb1        | 0.263823       | 0.163253       | 0.0757003      | 0.170217       | 0               | 0               | 0               |
| <b>Hoxb2</b> | <b>10.1712</b> | <b>7.58988</b> | <b>8.84227</b> | <b>9.88551</b> | <b>1.14194</b>  | <b>0.429984</b> | <b>0.635493</b> |
| <b>Hoxb3</b> | <b>15.5444</b> | <b>9.03791</b> | <b>10.0796</b> | <b>10.1138</b> | <b>1.14734</b>  | <b>0.487927</b> | <b>0.190532</b> |
| Hoxb4        | 3.33696        | 1.85601        | 6.08123        | 7.17635        | 1.50274         | 0.633982        | 0.333289        |
| Hoxb5        | 5.45048        | 3.08501        | 1.65578        | 1.5747         | 0.116106        | 0.259884        | 0.0592923       |
| Hoxb6        | 7.44606        | 6.26255        | 2.59088        | 1.10071        | 0.127488        | 0.357321        | 0.409925        |
| <b>Hoxb7</b> | <b>3.73702</b> | <b>7.29207</b> | <b>4.87969</b> | <b>2.61598</b> | <b>0.436472</b> | <b>0.585157</b> | <b>0.236978</b> |
| <b>Hoxb8</b> | <b>5.28756</b> | <b>9.72632</b> | <b>6.37805</b> | <b>2.35959</b> | <b>0.179695</b> | <b>1.07686</b>  | <b>0.5397</b>   |

|              |                 |                |                |                |                 |                 |                  |
|--------------|-----------------|----------------|----------------|----------------|-----------------|-----------------|------------------|
| <b>Hoxb9</b> | <b>0.952611</b> | <b>12.9594</b> | <b>12.0957</b> | <b>3.50208</b> | <b>1.16114</b>  | <b>3.02315</b>  | <b>3.35469</b>   |
| Hoxb13       | 0               | 0              | 1.61752        | 0.439049       | 1.70498         | 1.49739         | 2.03595          |
| <b>Hoxc4</b> | <b>8.44955</b>  | <b>5.57337</b> | <b>8.68496</b> | <b>6.71667</b> | <b>0.85438</b>  | <b>0.364068</b> | <b>0.821254</b>  |
| <b>Hoxc5</b> | <b>5.9824</b>   | <b>2.0779</b>  | <b>5.25836</b> | <b>4.67873</b> | <b>0.129342</b> | <b>0.202676</b> | <b>0.0545721</b> |
| <b>Hoxc6</b> | <b>15.0241</b>  | <b>10.366</b>  | <b>7.38581</b> | <b>7.28191</b> | <b>0.678214</b> | <b>1.27896</b>  | <b>0.983493</b>  |
| <b>Hoxc8</b> | <b>2.91471</b>  | <b>5.31873</b> | <b>3.53824</b> | <b>1.73341</b> | <b>0.246709</b> | <b>0.633316</b> | <b>0.630068</b>  |
| Hoxc9        | 1.59283         | 11.781         | 2.02833        | 1.4487         | 0.64896         | 0.0891928       | 0.250461         |
| Hoxc10       | 0.355147        | 47.8128        | 2.51934        | 1.1257         | 0.225081        | 0.464997        | 0.492305         |
| Hoxc11       | 0.136082        | 23.9723        | 0.338671       | 0.0819786      | 0               | 0.183168        | 0.0806175        |
| Hoxc12       | 0.14174         | 0.560111       | 0.282828       | 0.2064         | 0               | 0               | 0.0688265        |
| Hoxc13       | 0.505071        | 0.36348        | 1.85988        | 2.32218        | 1.5659          | 0.958146        | 1.33314          |
| Hoxd1        | 0.623704        | 0.928866       | 1.76617        | 1.11531        | 0.23532         | 0.120449        | 0.0308291        |
| Hoxd3        | 4.63632         | 4.02328        | 2.72668        | 2.93906        | 0.0771168       | 0.0952723       | 0.0351857        |
| Hoxd4        | 25.6768         | 15.8781        | 4.95451        | 2.59976        | 0.308445        | 0.277161        | 0.497798         |
| Hoxd8        | 30.634          | 17.9393        | 8.52023        | 6.88076        | 1.44745         | 0.634578        | 0.56248          |
| Hoxd9        | 94.0257         | 49.6073        | 14.0134        | 9.38877        | 1.15558         | 0.496137        | 0.318454         |
| Hoxd10       | 61.3826         | 39.345         | 6.44433        | 3.25347        | 0               | 0               | 0.0278281        |
| Hoxd11       | 165.499         | 78.6488        | 6.46441        | 3.41626        | 0.287081        | 0.184503        | 0                |
| Hoxd12       | 33.7959         | 15.9576        | 2.72343        | 1.02592        | 0               | 0.0212247       | 0.0213227        |
| Hoxd13       | 56.2849         | 23.4679        | 3.57753        | 1.42614        | 0.228505        | 0.432572        | 0.293781         |

*T-box genes*

|       |           |          |           |           |           |           |          |
|-------|-----------|----------|-----------|-----------|-----------|-----------|----------|
| Tbx2  | 18.0698   | 14.4142  | 48.8044   | 44.8117   | 0.646942  | 0.292124  | 0.401673 |
| Tbx3  | 21.2613   | 16.6262  | 34.979    | 26.3951   | 20.7587   | 13.0461   | 19.362   |
| Tbx4  | 4.00826   | 45.0306  | 0.136731  | 0.217436  | 1.63203   | 1.48997   | 1.16517  |
| Tbx5  | 44.9254   | 0.249299 | 0.998799  | 0.747425  | 0.0879211 | 0.223256  | 0.111104 |
| Tbx6  | 0.569514  | 0.309853 | 1.09221   | 0.96071   | 0.691704  | 0.681308  | 0.616006 |
| Tbx15 | 129.355   | 77.2259  | 5.30537   | 12.8616   | 1.25817   | 2.08379   | 0.985277 |
| Tbx18 | 28.0709   | 13.4202  | 5.79198   | 5.9929    | 0.541288  | 0.349802  | 0.210402 |
| Tbx19 | 0         | 0        | 0.0218001 | 0.0209732 | 0         | 0.0407884 | 0.020416 |
| Tbx20 | 0.0664201 | 0.220307 | 0.323426  | 0.338021  | 1.86421   | 0.184126  | 0.216497 |
| Tbx22 | 0         | 0        | 0         | 0         | 0         | 0         | 0        |

**Supplementary Table 3.** Expression values of 279 genes identified by Taher et al. (Taher L, Collette NM, Murugesh D, Maxwell E, Ovcharenko I, Loots GG. Global Gene Expression Analysis of Murine Limb Development. Emanuelli C, editor. PLoS ONE. 2011 Dec 9;6(12):e28358–60) that are suggested to be involved in limb development. Genes with FPKM <5 in all samples were not considered. Genes that are differentially expressed between control and induced fibrin bodies are highlighted in green (fold change  $\geq 2$  or  $\leq 0.25$ ). Of these, genes that have the similar expression to the limb are highlighted in bold green (fold change between 0.25 to 2).

| Gene            | Forelimb       | Hindlimb       | FB.1           | FB.2           | CTL              | 2C-iPSC.1        | 2C-iPSC.2       |
|-----------------|----------------|----------------|----------------|----------------|------------------|------------------|-----------------|
| 1700066M21Rik   | 5.97507        | 5.87152        | 5.25946        | 5.32743        | 5.79957          | 4.4864           | 4.12554         |
| <b>a</b>        | <b>9.43463</b> | <b>6.81888</b> | <b>9.36484</b> | <b>6.32013</b> | <b>0</b>         | <b>0.206183</b>  | <b>0</b>        |
| Aaas            | 49.9661        | 53.3592        | 56.2276        | 61.1966        | 72.1348          | 72.1402          | 79.7695         |
| Ada             | 4.38971        | 4.64673        | 1.53959        | 1.45942        | 6.25102          | 2.62413          | 2.37858         |
| <b>Add3</b>     | <b>21.4811</b> | <b>20.06</b>   | <b>31.0417</b> | <b>31.5029</b> | <b>15.5207</b>   | <b>19.9818</b>   | <b>17.0992</b>  |
| Aes             | 147.987        | 121.818        | 100.316        | 101.213        | 72.1284          | 160.192          | 173.831         |
| Akt1s1          | 71.614         | 91.7589        | 51.1884        | 45.9188        | 76.7708          | 31.723           | 159.726         |
| Alx1            | 2.971          | 3.75122        | 2.59097        | 3.03621        | 0.0668391        | 0.176646         | 0.0212798       |
| <b>Alx3</b>     | <b>22.5724</b> | <b>39.9693</b> | <b>2.03759</b> | <b>2.63218</b> | <b>0.0809824</b> | <b>0.0547531</b> | <b>0.141188</b> |
| Arid5b          | 7.48484        | 4.36672        | 23.4639        | 18.678         | 14.5408          | 14.2779          | 12.9446         |
| Arpc3           | 93.8783        | 108.653        | 124.422        | 144.497        | 120.776          | 123.282          | 137.229         |
| Arpc4           | 136.865        | 119.486        | 105.721        | 111.77         | 132.357          | 80.0744          | 84.1887         |
| Asb4            | 322.367        | 247.348        | 0.632676       | 0.563019       | 0.0998365        | 0.295113         | 0.31642         |
| Asna1           | 72.2988        | 71.9801        | 86.8699        | 98.8152        | 91.2231          | 165.064          | 148.962         |
| Aspn            | 0.0828421      | 0              | 0.0697353      | 0.0217843      | 0.431041         | 0.333857         | 0.465907        |
| Atp11b          | 11.2822        | 11.5468        | 28.5715        | 25.7978        | 26.8905          | 45.4036          | 47.7695         |
| Atp5j2          | 155.431        | 149.233        | 93.3196        | 107.906        | 102.787          | 151.647          | 127.179         |
| Atp5l           | 268.24         | 229.602        | 223.942        | 250.108        | 208.341          | 219.503          | 206.315         |
| BC005561        | 4.28396        | 4.63218        | 3.11478        | 2.8194         | 2.5028           | 3.83536          | 2.69022         |
| Bcam            | 32.9739        | 34.3344        | 16.5027        | 16.1985        | 25.5172          | 60.5514          | 57.5049         |
| Bhlha9          | 14.6683        | 11.4403        | 0              | 0              | 0.0997893        | 0.0508436        | 0               |
| Bin1            | 43.4705        | 43.6431        | 19.616         | 21.3425        | 14.2129          | 6.51658          | 6.72576         |
| <b>Bmp7</b>     | <b>22.8271</b> | <b>21.7391</b> | <b>13.5691</b> | <b>14.0194</b> | <b>4.6323</b>    | <b>5.93613</b>   | <b>6.02421</b>  |
| Btbd11          | 4.06324        | 4.5713         | 2.15612        | 2.55918        | 4.5385           | 4.62176          | 4.18827         |
| Calml4          | 1.81467        | 1.48259        | 0.788217       | 0.557941       | 0.84301          | 2.93706          | 3.08841         |
| Cap1            | 75.7587        | 80.8458        | 101.425        | 102.946        | 116.407          | 98.5496          | 104.79          |
| Capg            | 11.1515        | 7.93868        | 15.7484        | 20.3426        | 47.7488          | 23.3383          | 22.5894         |
| Capn6           | 292.975        | 270.91         | 12.2044        | 16.9799        | 15.6863          | 0.768553         | 1.71721         |
| Casc5           | 11.0802        | 12.7698        | 7.28925        | 10.5543        | 9.8199           | 13.5003          | 13.4493         |
| Cbl             | 18.1121        | 21.802         | 10.9715        | 9.46125        | 11.5981          | 17.3421          | 14.6277         |
| <b>Ccdc109b</b> | <b>3.69631</b> | <b>1.1261</b>  | <b>21.2602</b> | <b>9.35552</b> | <b>0.574637</b>  | <b>0.77312</b>   | <b>0.771887</b> |
| Ccdc39          | 1.80535        | 1.41836        | 1.75001        | 1.45397        | 1.14458          | 1.1799           | 1.46349         |
| Cenl1           | 28.5051        | 27.1427        | 36.7798        | 35.9407        | 25.6661          | 41.5737          | 41.038          |
| Cdc23           | 59.4383        | 59.758         | 34.2542        | 34.6517        | 33.4441          | 40.1538          | 39.5293         |
| Cdk14           | 7.64205        | 6.61778        | 2.18958        | 2.33163        | 3.59193          | 0.631908         | 0.276999        |
| <b>Cdo1</b>     | <b>49.5215</b> | <b>22.6112</b> | <b>47.2317</b> | <b>57.536</b>  | <b>5.15347</b>   | <b>4.38533</b>   | <b>7.4874</b>   |
| Cdx1            | 1.27655        | 2.15548        | 4.50776        | 3.05864        | 4.57149          | 0.829762         | 2.19127         |
| Cfl1            | 1073.74        | 1015           | 519.853        | 564.002        | 484.187          | 600.782          | 668.461         |
| Cldn6           | 22.8024        | 27.5802        | 140.691        | 165.633        | 91.2225          | 66.0886          | 71.8463         |
| Clk4            | 23.3636        | 19.7715        | 27.5694        | 28.7608        | 19.0628          | 21.8142          | 24.1004         |
| Coll4a1         | 0.528986       | 1.68861        | 2.88546        | 3.60104        | 0.181499         | 0.362572         | 0.194285        |
| <b>Coll1a1</b>  | <b>27.9195</b> | <b>13.6334</b> | <b>211.606</b> | <b>259.195</b> | <b>44.5925</b>   | <b>116.535</b>   | <b>80.2768</b>  |
| Cox6b2          | 12.5458        | 11.0168        | 137.338        | 137.335        | 77.0423          | 114.486          | 118.561         |
| Cpz             | 3.0661         | 2.89736        | 2.42868        | 1.54454        | 1.00615          | 1.4403           | 1.66936         |

|                 |                |                |                |                |                 |                  |                  |
|-----------------|----------------|----------------|----------------|----------------|-----------------|------------------|------------------|
| Crebzf          | 37.9763        | 35.3851        | 28.2726        | 21.7202        | 21.7969         | 16.0375          | 18.5483          |
| <b>Crif1</b>    | <b>61.5094</b> | <b>34.9428</b> | <b>25.297</b>  | <b>32.2074</b> | <b>2.52325</b>  | <b>6.28684</b>   | <b>4.73448</b>   |
| Csk             | 69.9063        | 65.4519        | 18.9822        | 19.0026        | 28.5358         | 22.74            | 24.4686          |
| Csrp1           | 42.4359        | 44.5177        | 67.8167        | 79.0992        | 264.847         | 55.9406          | 71.8665          |
| Ctse            | 0              | 0.0275353      | 0.0534536      | 0.0513184      | 0.0306952       | 0                | 0                |
| <b>Ctsk</b>     | <b>3.28558</b> | <b>1.69028</b> | <b>6.90403</b> | <b>9.1033</b>  | <b>3.12646</b>  | <b>9.45835</b>   | <b>5.84257</b>   |
| Cxcl14          | 22.5271        | 15.2572        | 5.57624        | 4.0933         | 2.60068         | 1.33491          | 1.73273          |
| Cyt11           | 0.137514       | 0              | 0              | 0              | 0               | 0                | 0                |
| <b>Daam2</b>    | <b>21.4113</b> | <b>19.4244</b> | <b>17.871</b>  | <b>11.9667</b> | <b>0.252755</b> | <b>0.247842</b>  | <b>0.270719</b>  |
| Dkk2            | 2.04847        | 0.995971       | 3.59318        | 4.40577        | 0.172665        | 0.361789         | 0.361559         |
| Dlk2            | 0.332553       | 0.252177       | 2.96722        | 5.08517        | 2.05875         | 0.907293         | 0.423259         |
| <b>Dnm1</b>     | <b>38.0195</b> | <b>24.0078</b> | <b>26.0383</b> | <b>25.5237</b> | <b>5.33389</b>  | <b>15.2887</b>   | <b>17.8535</b>   |
| Dnm3            | 2.08875        | 1.51086        | 1.19618        | 0.958451       | 0.223766        | 0.136586         | 0.0202819        |
| Dusp7           | 61.6181        | 56.8596        | 16.8563        | 19.8997        | 16.7196         | 10.0533          | 10.6758          |
| Dynlrb1         | 159.783        | 143.41         | 125.761        | 123.64         | 105.041         | 105.03           | 113.484          |
| E130012A19Rik   | 57.2814        | 53.411         | 78.3965        | 75.6494        | 74.8338         | 54.4046          | 68.5891          |
| <b>Efna4</b>    | <b>38.8253</b> | <b>34.8108</b> | <b>18.3384</b> | <b>20.5926</b> | <b>7.54674</b>  | <b>6.55617</b>   | <b>7.98012</b>   |
| Epha3           | 4.06023        | 2.08416        | 3.75059        | 4.66923        | 0.0365137       | 0.189093         | 0.0342185        |
| Ephb4           | 75.8043        | 63.1137        | 26.7806        | 27.2575        | 20.1979         | 21.0805          | 21.243           |
| Etv5            | 43.3547        | 46.7813        | 32.7895        | 41.4962        | 48.348          | 94.6367          | 77.9298          |
| <b>Fam171a1</b> | <b>23.1768</b> | <b>21.6653</b> | <b>9.52134</b> | <b>8.49551</b> | <b>3.89766</b>  | <b>3.46954</b>   | <b>2.63445</b>   |
| Fanc1           | 9.60248        | 10.4213        | 5.36108        | 4.94982        | 7.94762         | 14.2445          | 10.8656          |
| <b>Fbn2</b>     | <b>52.3076</b> | <b>54.1659</b> | <b>24.2069</b> | <b>24.7535</b> | <b>0.437992</b> | <b>0.582973</b>  | <b>0.297882</b>  |
| Fcho2           | 13.0266        | 11.3865        | 23.9874        | 21.245         | 23.401          | 25.5913          | 28.1986          |
| Fgf18           | 0.971816       | 0.419921       | 0.142451       | 0.0687277      | 0.125288        | 0.639095         | 0.514802         |
| Fgf8            | 69.6968        | 75.7258        | 1.56978        | 0.303374       | 0.405132        | 1.91589          | 0.602125         |
| Fibin           | 15.5004        | 4.95348        | 0.127302       | 0.387891       | 0.12301         | 0.268051         | 0.212481         |
| <b>Figf</b>     | <b>9.12008</b> | <b>5.67653</b> | <b>5.92072</b> | <b>8.90633</b> | <b>0.822256</b> | <b>2.71416</b>   | <b>1.38565</b>   |
| Frg1            | 41.1702        | 39.9226        | 32.4641        | 38.4829        | 43.5341         | 41.0104          | 45.8737          |
| Fyttd1          | 34.1727        | 35.6663        | 39.1459        | 41.0539        | 56.546          | 28.9044          | 38.175           |
| G6pd2           | 0              | 0              | 0.0242751      | 0              | 0               | 0                | 0                |
| Gabrp           | 0.90219        | 0.0904544      | 0.231922       | 0.509741       | 0.275698        | 0.189927         | 0.314652         |
| Gal             | 0.100843       | 0              | 0.408122       | 0.802563       | 0.18788         | 0.448887         | 0.945391         |
| Gdf5            | 0.913211       | 0.236897       | 0.116368       | 0.0897735      | 0.151789        | 0.260373         | 0.284933         |
| Gdpd5           | 4.21615        | 2.95209        | 13.9666        | 10.1197        | 13.4633         | 2.96043          | 3.04108          |
| Gorab           | 11.179         | 9.77145        | 10.3964        | 10.0469        | 5.67528         | 6.81228          | 7.04244          |
| Grem1           | 18.898         | 20.0018        | 11.8786        | 10.7486        | 5.75164         | 0.742682         | 0.619742         |
| Gsc             | 27.0529        | 8.48962        | 0.456637       | 0.398774       | 1.23991         | 0.271938         | 0.894929         |
| Hadha           | 41.1836        | 41.1351        | 26.9481        | 28.3446        | 27.7321         | 34.0971          | 33.2489          |
| Hdac8           | 8.4672         | 7.68585        | 3.84209        | 3.94113        | 2.01169         | 2.66155          | 1.95316          |
| Hipk3           | 12.8229        | 14.753         | 12.7169        | 10.8297        | 14.7598         | 7.72483          | 8.11292          |
| Hist1h2ae       | 6.96533        | 4.28168        | 0.530833       | 0.7955         | 1.75806         | 10.9413          | 6.88122          |
| Hist1h2bp       | 13.5549        | 13.6227        | 16.4225        | 14.9518        | 17.9727         | 29.2556          | 25.8943          |
| <b>Hoxa11</b>   | <b>77.8928</b> | <b>79.6439</b> | <b>10.694</b>  | <b>7.53685</b> | <b>0.207571</b> | <b>0.0229215</b> | <b>0.163433</b>  |
| Hoxa13          | 13.7286        | 6.13086        | 1.62043        | 1.00489        | 0.887693        | 0.242069         | 0.273141         |
| <b>Hoxa9</b>    | <b>94.9514</b> | <b>77.0644</b> | <b>10.2438</b> | <b>6.6549</b>  | <b>0.339014</b> | <b>0.503456</b>  | <b>0.491208</b>  |
| <b>Hoxb5</b>    | <b>5.45048</b> | <b>3.08501</b> | <b>1.65578</b> | <b>1.5747</b>  | <b>0.116106</b> | <b>0.259884</b>  | <b>0.0592923</b> |
| <b>Hoxb6</b>    | <b>7.44606</b> | <b>6.26255</b> | <b>2.59088</b> | <b>1.10071</b> | <b>0.127488</b> | <b>0.357321</b>  | <b>0.409925</b>  |
| <b>Hoxc5</b>    | <b>5.9824</b>  | <b>2.0779</b>  | <b>5.25836</b> | <b>4.67873</b> | <b>0.129342</b> | <b>0.202676</b>  | <b>0.0545721</b> |
| Hoxd10          | 61.3826        | 39.345         | 6.44433        | 3.25347        | 0               | 0                | 0.0278281        |
| Hoxd11          | 165.499        | 78.6488        | 6.46441        | 3.41626        | 0.287081        | 0.184503         | 0                |
| Hoxd12          | 33.7959        | 15.9576        | 2.72343        | 1.02592        | 0               | 0.0212247        | 0.0213227        |
| Hoxd13          | 56.2849        | 23.4679        | 3.57753        | 1.42614        | 0.228505        | 0.432572         | 0.293781         |
| Hoxd8           | 30.634         | 17.9393        | 8.52023        | 6.88076        | 1.44745         | 0.634578         | 0.56248          |

|             |                |                |                |                |                 |                 |                 |
|-------------|----------------|----------------|----------------|----------------|-----------------|-----------------|-----------------|
| Hoxd9       | 94.0257        | 49.6073        | 14.0134        | 9.38877        | 1.15558         | 0.496137        | 0.318454        |
| Hyls1       | 10.2291        | 9.86905        | 7.34956        | 9.0167         | 10.2295         | 13.1329         | 17.686          |
| Id1         | 131.751        | 107.508        | 288.805        | 269.808        | 17.5547         | 19.5787         | 14.8277         |
| Ifitm2      | 312.482        | 319.71         | 315.586        | 349.642        | 249.82          | 639.19          | 623.999         |
| Ifrd2       | 29.9204        | 36.5611        | 15.397         | 17.6033        | 18.4134         | 29.2732         | 25.7846         |
| Igfbp5      | 44.2553        | 56.0146        | 11.2949        | 16.8814        | 9.98942         | 2.40143         | 1.73424         |
| Kcne3       | 10.2677        | 6.90358        | 0.908163       | 0.966859       | 0.308421        | 0               | 0               |
| Kctd12b     | 1.68331        | 2.67193        | 0.595182       | 0.457055       | 0.207955        | 0.15818         | 0.177665        |
| Kdm5a       | 11.097         | 10.2874        | 14.6233        | 11.9621        | 15.5991         | 11.3464         | 13.8194         |
| Kera        | 0.0591956      | 0              | 0              | 0              | 0               | 0               | 0               |
| Khsrp       | 95.2811        | 100.232        | 53.4872        | 47.5024        | 60.4846         | 85.5298         | 94.7011         |
| Krt14       | 3.80085        | 1.5651         | 1.82626        | 3.28905        | 30.2811         | 0.142687        | 0.0888338       |
| Krt17       | 1.22492        | 0.290155       | 0.307395       | 0.264884       | 1.29796         | 1.57263         | 1.4102          |
| Krt5        | 24.5311        | 18.848         | 0              | 0.331031       | 0.461283        | 0.0447305       | 0.0459119       |
| Lad1        | 3.04634        | 3.81134        | 10.1207        | 7.60439        | 10.3645         | 3.92952         | 4.20434         |
| Laptm4a     | 151.906        | 150.768        | 303.444        | 338.514        | 231.26          | 169.585         | 202.616         |
| Lbx1        | 19.4047        | 14.3668        | 0.588205       | 0.647748       | 1.36827         | 0.20259         | 0.266896        |
| <b>Lef1</b> | <b>30.8284</b> | <b>35.8057</b> | <b>37.831</b>  | <b>31.3818</b> | <b>2.28727</b>  | <b>9.06981</b>  | <b>8.20697</b>  |
| Lhx2        | 75.0331        | 90.8337        | 2.8698         | 2.34693        | 0.466974        | 1.35984         | 1.80761         |
| Lhx9        | 86.4284        | 86.7674        | 1.98586        | 1.24511        | 0.0800597       | 0.0226796       | 0.0532941       |
| Lix1        | 118.07         | 95.4479        | 8.13895        | 4.72153        | 0.341897        | 0.510563        | 0.299873        |
| Loxl2       | 13.4397        | 9.647          | 77.661         | 84.6951        | 43.0369         | 48.021          | 35.2054         |
| Lsm2        | 114.252        | 117.653        | 46.1501        | 49.8325        | 73.7525         | 84.1239         | 85.5093         |
| Map2k6      | 35.7863        | 34.0546        | 10.1205        | 11.5148        | 10.709          | 10.7864         | 12.5845         |
| Matn4       | 0              | 0              | 1.02865        | 0.419072       | 0.440676        | 0.224327        | 0.311113        |
| Maz         | 201.68         | 186.627        | 92.9568        | 97.2584        | 97.9985         | 170.723         | 167.001         |
| Megf6       | 23.0254        | 19.5722        | 3.65303        | 3.87921        | 5.63757         | 4.25543         | 4.14533         |
| Met         | 9.25183        | 6.50032        | 3.96534        | 3.60957        | 3.00035         | 1.41688         | 1.40898         |
| Mme         | 6.91662        | 7.7273         | 17.8207        | 20.5131        | 21.3684         | 11.7556         | 18.1392         |
| Mmp2        | 115.017        | 90.0185        | 39.2394        | 39.6548        | 15.5644         | 25.9644         | 15.5644         |
| Msx1        | 130.815        | 162.33         | 30.272         | 14.2444        | 0.416495        | 0.854331        | 0.774057        |
| <b>Msx2</b> | <b>23.8193</b> | <b>14.6941</b> | <b>29.9828</b> | <b>16.4369</b> | <b>10.0444</b>  | <b>0.545068</b> | <b>0.465049</b> |
| Mup1        | 0.107705       | 0              | 0              | 0              | 0               | 0               | 0               |
| Mybpc1      | 2.76997        | 1.34003        | 13.0164        | 4.58809        | 0.113109        | 0.0432087       | 0.061784        |
| Myl1        | 0.0924339      | 0.398657       | 0.191725       | 0.371841       | 0.420568        | 0               | 0               |
| Net1        | 41.0093        | 38.6494        | 32.6418        | 31.9351        | 32.1068         | 20.1178         | 21.8142         |
| Nnat        | 1049.51        | 968.215        | 85.6294        | 94.3452        | 13.296          | 19.2857         | 15.3542         |
| Nog         | 0.438899       | 0.488936       | 6.6218         | 5.09084        | 8.74624         | 0.628629        | 0.501818        |
| Nolc1       | 68.4859        | 78.5039        | 26.4518        | 28.8153        | 33.5616         | 39.4161         | 34.6194         |
| Npm3        | 80.5701        | 95.89          | 55.1231        | 63.2277        | 87.7264         | 137.371         | 142.219         |
| Nrk         | 8.2377         | 7.77015        | 7.58915        | 8.52963        | 77.8522         | 0.727019        | 1.0228          |
| Nsa2        | 69.6815        | 74.1745        | 92.5636        | 98.4942        | 69.0341         | 55.7489         | 61.3349         |
| Ntf5        | 2.63918        | 2.18949        | 1.84193        | 1.59152        | 3.94581         | 1.51919         | 1.12461         |
| Ogn         | 0.135294       | 0              | 0.0212857      | 0.0401423      | 0.167775        | 0.70825         | 0.303806        |
| Ogt         | 50.6666        | 45.4692        | 92.7187        | 82.5496        | 63.352          | 52.7729         | 40.9399         |
| Osr1        | 16.1168        | 6.76643        | 1.65111        | 3.18937        | 0.0985779       | 0.346907        | 0.125905        |
| <b>Osr2</b> | <b>17.935</b>  | <b>4.25681</b> | <b>8.07799</b> | <b>5.77826</b> | <b>0.823002</b> | <b>1.38068</b>  | <b>1.12835</b>  |
| Otub1       | 102.167        | 97.0934        | 57.3496        | 62.5674        | 54.707          | 46.9973         | 51.2829         |
| Parvb       | 24.5522        | 34.6666        | 32.5406        | 30.1675        | 32.7393         | 23.0216         | 27.0694         |
| Pcgf1       | 12.5643        | 14.1156        | 11.204         | 13.6959        | 9.84559         | 16.2026         | 16.8044         |
| Pddc1       | 24.6406        | 20.9583        | 28.9373        | 33.2118        | 34.3099         | 32.3441         | 30.4665         |
| Pdgfa       | 29.1849        | 26.1193        | 23.1474        | 26.6573        | 43.5556         | 9.56658         | 12.9285         |
| Pdia4       | 111.4          | 117.022        | 55.6112        | 58.0359        | 64.093          | 91.1645         | 84.7748         |
| Pdk2        | 3.90265        | 3.48095        | 9.86946        | 9.94152        | 6.94993         | 9.29613         | 10.8025         |

|          |          |           |           |           |           |           |           |
|----------|----------|-----------|-----------|-----------|-----------|-----------|-----------|
| Pecam1   | 14.3698  | 15.1912   | 4.9807    | 7.638     | 19.9265   | 31.8823   | 31.3898   |
| Perp     | 19.6115  | 19.0193   | 22.3007   | 26.3247   | 37.4585   | 17.4326   | 21.7774   |
| Pfn1     | 1141.78  | 1067.52   | 437.249   | 504.507   | 615.123   | 681.987   | 779.426   |
| Phf6     | 50.3703  | 52.1371   | 13.2761   | 12.4681   | 4.09508   | 12.5415   | 12.7262   |
| Pi4kb    | 16.5087  | 14.5618   | 16.7345   | 18.1497   | 14.4282   | 11.372    | 11.3623   |
| Pkdec    | 167.195  | 98.8161   | 25.2516   | 29.2708   | 6.74713   | 4.60558   | 2.75991   |
| Pknx1    | 13.1542  | 11.6304   | 9.62391   | 10.0969   | 9.68333   | 9.36633   | 8.67968   |
| Plekhj1  | 31.1159  | 33.8534   | 21.8845   | 23.7435   | 27.8443   | 24.3979   | 29.2864   |
| Pmaip1   | 32.5489  | 6.4358    | 39.2891   | 46.539    | 37.022    | 42.4687   | 58.4664   |
| Ppp3r1   | 32.65    | 36.5691   | 39.5835   | 37.926    | 30.4371   | 29.1812   | 31.3582   |
| Prl2c2   | 0        | 0.0716021 | 0.270664  | 0.610804  | 62.3889   | 2.99613   | 2.19912   |
| Prrx1    | 167.133  | 150.165   | 65.1521   | 59.7432   | 2.57528   | 2.91353   | 1.53869   |
| Prrx2    | 171.751  | 128.428   | 79.787    | 78.1328   | 3.02358   | 6.59158   | 6.20404   |
| Ptbp1    | 364.345  | 405.717   | 189.707   | 197.457   | 183.07    | 312.124   | 337.456   |
| Ptk7     | 75.1419  | 60.3827   | 114.529   | 99.6463   | 23.2673   | 57.6785   | 57.542    |
| Ptp4a3   | 17.4563  | 16.5201   | 10.1673   | 10.9783   | 17.522    | 27.9917   | 31.5803   |
| Pttg1    | 34.78    | 24.7199   | 49.3894   | 68.2936   | 102.387   | 109.705   | 138.828   |
| Rab4a    | 12.3622  | 13.2579   | 17.1727   | 17.7965   | 17.5865   | 18.9786   | 18.5052   |
| Rab5c    | 99.7538  | 103.832   | 140.608   | 162.064   | 109.238   | 91.5909   | 96.9742   |
| Rabl3    | 15.4955  | 15.7189   | 11.0757   | 12.0328   | 9.09944   | 7.82009   | 7.7855    |
| Rac3     | 11.3725  | 10.2214   | 31.5458   | 28.2577   | 9.08567   | 8.01017   | 8.89274   |
| Ramp2    | 13.8717  | 20.2047   | 18.8448   | 21.3138   | 22.5832   | 2.49367   | 2.60936   |
| Ranbp6   | 11.4101  | 9.74298   | 8.1229    | 7.88274   | 4.42365   | 3.25313   | 2.61819   |
| Rarb     | 5.85522  | 14.5257   | 1.46739   | 1.94018   | 0.541896  | 0.325749  | 0.28498   |
| Rarg     | 81.1608  | 61.1086   | 28.0062   | 23.033    | 17.7308   | 46.5494   | 48.4542   |
| Rbm39    | 157.165  | 153.084   | 146.328   | 141.062   | 130.358   | 159.04    | 185.656   |
| Rnf25    | 23.1687  | 20.6531   | 20.7198   | 19.518    | 23.1002   | 17.2147   | 16.009    |
| Rps24    | 3736.78  | 4469.52   | 3919.38   | 4628.68   | 3113.73   | 3444.03   | 4413.21   |
| Rspo2    | 5.86554  | 7.67423   | 0.0697683 | 0.0331241 | 0.115161  | 0.0166029 | 0.0161632 |
| Rspo4    | 26.3424  | 17.6002   | 1.32825   | 0.763647  | 0.313664  | 0.820544  | 0.950447  |
| Rtl1     | 0.555663 | 0.771419  | 0.999117  | 0.947673  | 0.464853  | 0.437189  | 0.29622   |
| Scaper   | 2.40238  | 2.29482   | 3.92491   | 4.49655   | 5.38275   | 4.7712    | 4.43583   |
| Scn2b    | 8.02517  | 9.29223   | 0.166405  | 0.234257  | 0.0868045 | 0.246523  | 0.145452  |
| Scn4b    | 1.6593   | 3.86095   | 0.0221241 | 0.0212426 | 0.0318111 | 0.146413  | 0.14664   |
| Sdccag3  | 30.0177  | 30.6953   | 24.0761   | 28.5662   | 27.5963   | 28.5117   | 28.6794   |
| Sertad4  | 54.7685  | 49.403    | 7.68698   | 13.0174   | 1.45951   | 2.12292   | 1.88153   |
| Shox2    | 134.374  | 77.5964   | 7.82733   | 12.0778   | 0.413723  | 0.249948  | 0.229572  |
| Slc25a24 | 19.2488  | 17.8159   | 18.6635   | 17.0866   | 14.2915   | 2.67803   | 2.25202   |
| Slc4a1   | 18.2199  | 24.8866   | 0.050299  | 0.0484703 | 0.130716  | 0.273527  | 0.202658  |
| Slc4a7   | 13.7914  | 15.835    | 19.1185   | 16.7464   | 8.84776   | 15.286    | 14.1068   |
| Smn1     | 54.3485  | 61.0439   | 34.7162   | 35.8582   | 35.8887   | 43.7921   | 51.165    |
| Snail    | 63.9455  | 61.1623   | 58.0177   | 51.8893   | 42.6552   | 4.87159   | 7.43761   |
| Snap91   | 2.67777  | 1.38631   | 3.32548   | 2.76875   | 1.30382   | 0.394736  | 0.564272  |
| Snrpb2   | 61.2918  | 77.8938   | 31.2503   | 32.9216   | 31.2448   | 30.3222   | 37.3585   |
| Sox8     | 5.0172   | 8.41812   | 0.171377  | 0.714158  | 0.265453  | 1.43261   | 1.30099   |
| Sp4      | 7.97996  | 6.37753   | 4.0627    | 4.1989    | 3.58967   | 4.36949   | 4.15837   |
| Spry1    | 29.3556  | 30.4344   | 23.6938   | 23.4322   | 4.53007   | 11.5913   | 11.7109   |
| Supt16   | 98.5511  | 106.214   | 57.3224   | 60.2561   | 62.711    | 100.321   | 94.5392   |
| Taf7     | 9.72104  | 10.6942   | 36.1016   | 37.7648   | 42.4839   | 31.9143   | 31.1315   |
| Tbx15    | 129.355  | 77.2259   | 5.30537   | 12.8616   | 1.25817   | 2.08379   | 0.985277  |
| Tbx18    | 28.0709  | 13.4202   | 5.79198   | 5.9929    | 0.541288  | 0.349802  | 0.210402  |
| Tbx2     | 18.0698  | 14.4142   | 48.8044   | 44.8117   | 0.646942  | 0.292124  | 0.401673  |
| Tbx3     | 21.2613  | 16.6262   | 34.979    | 26.3951   | 20.7587   | 13.0461   | 19.362    |
| Tbx4     | 4.00826  | 45.0306   | 0.136731  | 0.217436  | 1.63203   | 1.48997   | 1.16517   |

|               |                |                |                |                |                  |                  |                  |
|---------------|----------------|----------------|----------------|----------------|------------------|------------------|------------------|
| Tbx5          | 44.9254        | 0.249299       | 0.998799       | 0.747425       | 0.0879211        | 0.223256         | 0.111104         |
| Tgfb3         | 4.80494        | 4.24422        | 19.6985        | 14.4288        | 18.6098          | 3.74457          | 2.62582          |
| Thoc2         | 22.6652        | 20.4258        | 34.2216        | 34.0247        | 24.1078          | 18.4357          | 19.6459          |
| Tmed2         | 157.299        | 172.185        | 197.621        | 198.843        | 197.021          | 90.1308          | 105.869          |
| Tmem119       | 73.3167        | 55.3614        | 11.5096        | 13.3604        | 0.76658          | 0.423083         | 0.404105         |
| Tmem173       | 11.4076        | 13.911         | 1.33304        | 2.0005         | 0.550244         | 0.568308         | 0.306472         |
| Tmem87a       | 13.0253        | 11.519         | 27.1928        | 30.1553        | 29.3963          | 21.4309          | 24.3282          |
| Tnrc18        | 64.0181        | 50.8473        | 41.9293        | 33.8477        | 23.6502          | 12.5882          | 14.2585          |
| Trp53         | 172.294        | 186.254        | 63.6498        | 63.7133        | 88.9889          | 142.791          | 142.018          |
| Trp63         | 9.68747        | 9.96306        | 0.16922        | 0.207069       | 0.0935972        | 0.121726         | 0.0111572        |
| <b>Tshz1</b>  | <b>20.0539</b> | <b>18.4224</b> | <b>10.7385</b> | <b>8.6238</b>  | <b>2.03582</b>   | <b>0.533155</b>  | <b>0.533435</b>  |
| Tshz2         | 12.6174        | 13.2845        | 1.68838        | 1.72904        | 0.131484         | 0.251087         | 0.289495         |
| Tshz3         | 4.78007        | 2.9178         | 8.76472        | 8.89352        | 0.553751         | 0.703271         | 0.425478         |
| Ttc14         | 16.4863        | 16.446         | 22.6582        | 21.5098        | 20.0032          | 20.9742          | 18.7207          |
| <b>Twist1</b> | <b>235.245</b> | <b>246.84</b>  | <b>240.8</b>   | <b>223.845</b> | <b>4.56031</b>   | <b>7.11627</b>   | <b>7.19662</b>   |
| <b>Twist2</b> | <b>47.1151</b> | <b>45.7171</b> | <b>40.5805</b> | <b>34.2956</b> | <b>4.08041</b>   | <b>4.48405</b>   | <b>2.7415</b>    |
| Ube2s         | 366.203        | 375.188        | 138.788        | 150.52         | 185.931          | 254.494          | 244.956          |
| Ubl7          | 45.1915        | 40.9185        | 22.606         | 22.4136        | 37.7613          | 32.6835          | 33.2821          |
| Upfl          | 57.3142        | 57.6866        | 21.4578        | 20.1607        | 37.9113          | 54.9293          | 59.5071          |
| Usf1          | 47.606         | 44.8313        | 31.1101        | 31.441         | 29.9689          | 46.9824          | 44.7003          |
| Vps72         | 103.887        | 95.497         | 37.6948        | 37.4341        | 38.0612          | 43.329           | 49.0723          |
| Wdfy1         | 1.9866         | 2.05345        | 19.569         | 21.9559        | 15.2694          | 14.4714          | 15.0531          |
| <i>Wif1</i>   | <i>9.70041</i> | <i>5.06539</i> | <i>115.787</i> | <i>58.8053</i> | <i>0.0960344</i> | <i>0.0510613</i> | <i>0.0950714</i> |
| Wnt5a         | 55.9313        | 40.1678        | 14.6161        | 13.3926        | 1.67552          | 0.795035         | 0.55928          |
| Wnt6          | 26.0981        | 20.5897        | 3.02657        | 2.30985        | 0.681776         | 0.532431         | 0.594223         |
| Wnt6          | 26.0981        | 20.5897        | 3.02657        | 2.30985        | 0.681776         | 0.532431         | 0.594223         |
| Wnt7a         | 4.90943        | 4.78793        | 0.313289       | 0.265261       | 0.840938         | 0.121928         | 0.209446         |
| Xab2          | 33.6736        | 33.6165        | 29.5454        | 31.9151        | 43.8305          | 49.4707          | 51.0135          |
| Zbtb12        | 65.0078        | 70.9933        | 14.5347        | 14.3709        | 7.04446          | 14.8785          | 14.1189          |
| Zfhx4         | 22.8036        | 12.9883        | 5.47919        | 5.16916        | 0.19863          | 0.343089         | 0.251946         |
| Zfp101        | 19.9099        | 21.2336        | 5.03554        | 5.77193        | 4.67429          | 5.91502          | 5.07291          |
| Zfp146        | 60.4194        | 61.496         | 31.9391        | 28.5012        | 19.3513          | 17.0245          | 15.7904          |
| Zfp2          | 5.92276        | 4.70699        | 3.90798        | 4.4919         | 2.74094          | 4.62313          | 5.01945          |
| Zfp458        | 0.699602       | 0.647974       | 0.746991       | 0.474715       | 0.395859         | 0.189757         | 0.128882         |



**Supplementary Table 4. PCR primers used in this work**

| <i>Gene</i>   | Forward Primer          | Reverse Primer         | Product (bp) |
|---------------|-------------------------|------------------------|--------------|
| <i>Col2a1</i> | CATCTTGCCGCATCTGTGTG    | TGCCCCTTTGGCCCTAATTT   | 163          |
| <i>Gata4</i>  | CACCCCAATCTCGATATGTTTGA | GCACAGGTAGTGTCCCGTC    | 162          |
| <i>Gapdh</i>  | TGTGAACGGATTTGGCCGTA    | ACTGTGCCGTTGAATTTGCC   | 159          |
| <i>Gli3</i>   | CATCCACCCTGCTCCAACAT    | CTGTGAGGACTCAGAAGGGC   | 103          |
| <i>Kdr</i>    | GGATAACCTGGCTGACCCG     | GAACCACAGAGCGACAGCTA   | 230          |
| <i>Meox1</i>  | CCGGACTGAGCGAATCTTCA    | CTTCTCCGTCTCATTGGCGA   | 214          |
| <i>Nanog</i>  | TTGCTTACAAGGGTCTGCTACT  | ACTGGTAGAAGAATCAGGGCT  | 100          |
| <i>Oct4</i>   | AGGTGAGCCGTCTTTCCAC     | GGTCCACAGTATGCCATCCC   | 269          |
| <i>OC</i>     | CAGAGGGGAAGGGACAACAC    | GGCTTCCTGCCAGTACCTTT   | 122          |
| <i>OPN</i>    | TCCCTCGATGTCATCCCTGT    | ATCACATCCGACTGATCGGC   | 167          |
| <i>Pitx1</i>  | AGCACTCGTCGTTTGGCTAT    | CAAAACCAACCTGGAGGCGG   | 215          |
| <i>Prx1</i>   | CAAGTTCCGCAGGAATGAGC    | TGACCATGGCGCTGTACG     | 170          |
| <i>Runx2</i>  | GCGCATTCTCATCCCAGTA     | CTGGCTCAGATAGGAGGGGT   | 178          |
| <i>Sox2</i>   | AGTGGTACGTTAGGCGCTTC    | CCCAGCAAGAACCCTTTCCT   | 207          |
| <i>Sox9</i>   | TCCCCGCAACAGATCTCCTA    | AGGTGGAGTAGAGCCCTGAG   | 157          |
| <i>T</i>      | GGTATTCCCAATGGGGGTGG    | GACCGGTGGTTCCTTAGAGC   | 142          |
| <i>Tbx5</i>   | AATCCCCAGCACAAACTCCA    | GCGAGGTTCTATTCTCGCTCTG | 125          |
